# Supplementary material for: Cannabis Use in Physicians: A Systematic Review and Meta-Analysis
Source: Medicines (Basel). 2023 Apr 27;10(5):29. doi: 10.3390/medicines10050029 (PMC10221702; doi:10.3390/medicines10050029)
Supplement: Supplementary file 1 [file medicines-10-00029-s001.zip]

Archive with 10 entries (10 files):
- medicines-2317431-supplementary/S1.pdf
- medicines-2317431-supplementary/S2.pdf
- medicines-2317431-supplementary/S3.pdf
- medicines-2317431-supplementary/S4.pptx
- medicines-2317431-supplementary/S5a.pptx
- medicines-2317431-supplementary/S5b.pptx
- medicines-2317431-supplementary/S6.pptx
- medicines-2317431-supplementary/S7.pptx
- medicines-2317431-supplementary/S8.pptx
- medicines-2317431-supplementary/S9.pptx
